# Supplementary material
Source: PubMed Central journal article supplement (PMC8335576)
Supplement: jama-e2110296-s001.pdf [file jama-e2110296-s001.pdf]

## Supplemental Online Content

Blackwood B, Tume LN, Morris KP, et al; for the SANDWICH Collaborators. Effect of a sedation and ventilator liberation protocol vs usual care on duration of invasive mechanical ventilation in pediatric intensive care units: a randomized clinical trial. *JAMA*. doi:10.1001/jama.2021.10296

**eFigure 1.** Study schematic

**eFigure 2.** PRagmatic-Explanatory Continuum Indicator Summary (PRECIS-2)

**eFigure 3.** Probability and time to successful extubation by observation period in all children

**eFigure 4.** Subgroup analyses for time to successful extubation

### **eMethods**

**eTable 1.** Usual care in participating pediatric ICUs

**eTable 2.** Characteristics of UK pediatric ICUs

**eTable 3.** Characteristics of all patient admissions at baseline

**eTable 4.** Proportion (%) of staff trained within 8 and 12 weeks at each hospital site

**eTable 5.** Proportion (%) of intervention adherence at each hospital site

**eTable 6.** Reasons provided for not progressing to conduct a spontaneous breathing trial when the screening criteria were satisfied

**eTable 7.** Reasons provided for not progressing to extubation when the spontaneous trial was successful

**eTable 8.** Outcomes for all children

**eTable 9.** Intra-cluster correlation coefficient variance components

**eTable 10.** Adverse and serious adverse events (prolonged ventilation cohort)

**eTable 11.** Adverse and serious adverse events (all children)

**eTable 12.** Baseline ventilation parameters

**eTable 13.** Comparison of ventilation parameters two hours prior to extubation (control period) and prior to the start of SBT (intervention period)

#### **eReferences**

This supplemental material has been provided by the authors to give readers additional information about their work.

eFigure 1. Study schematic

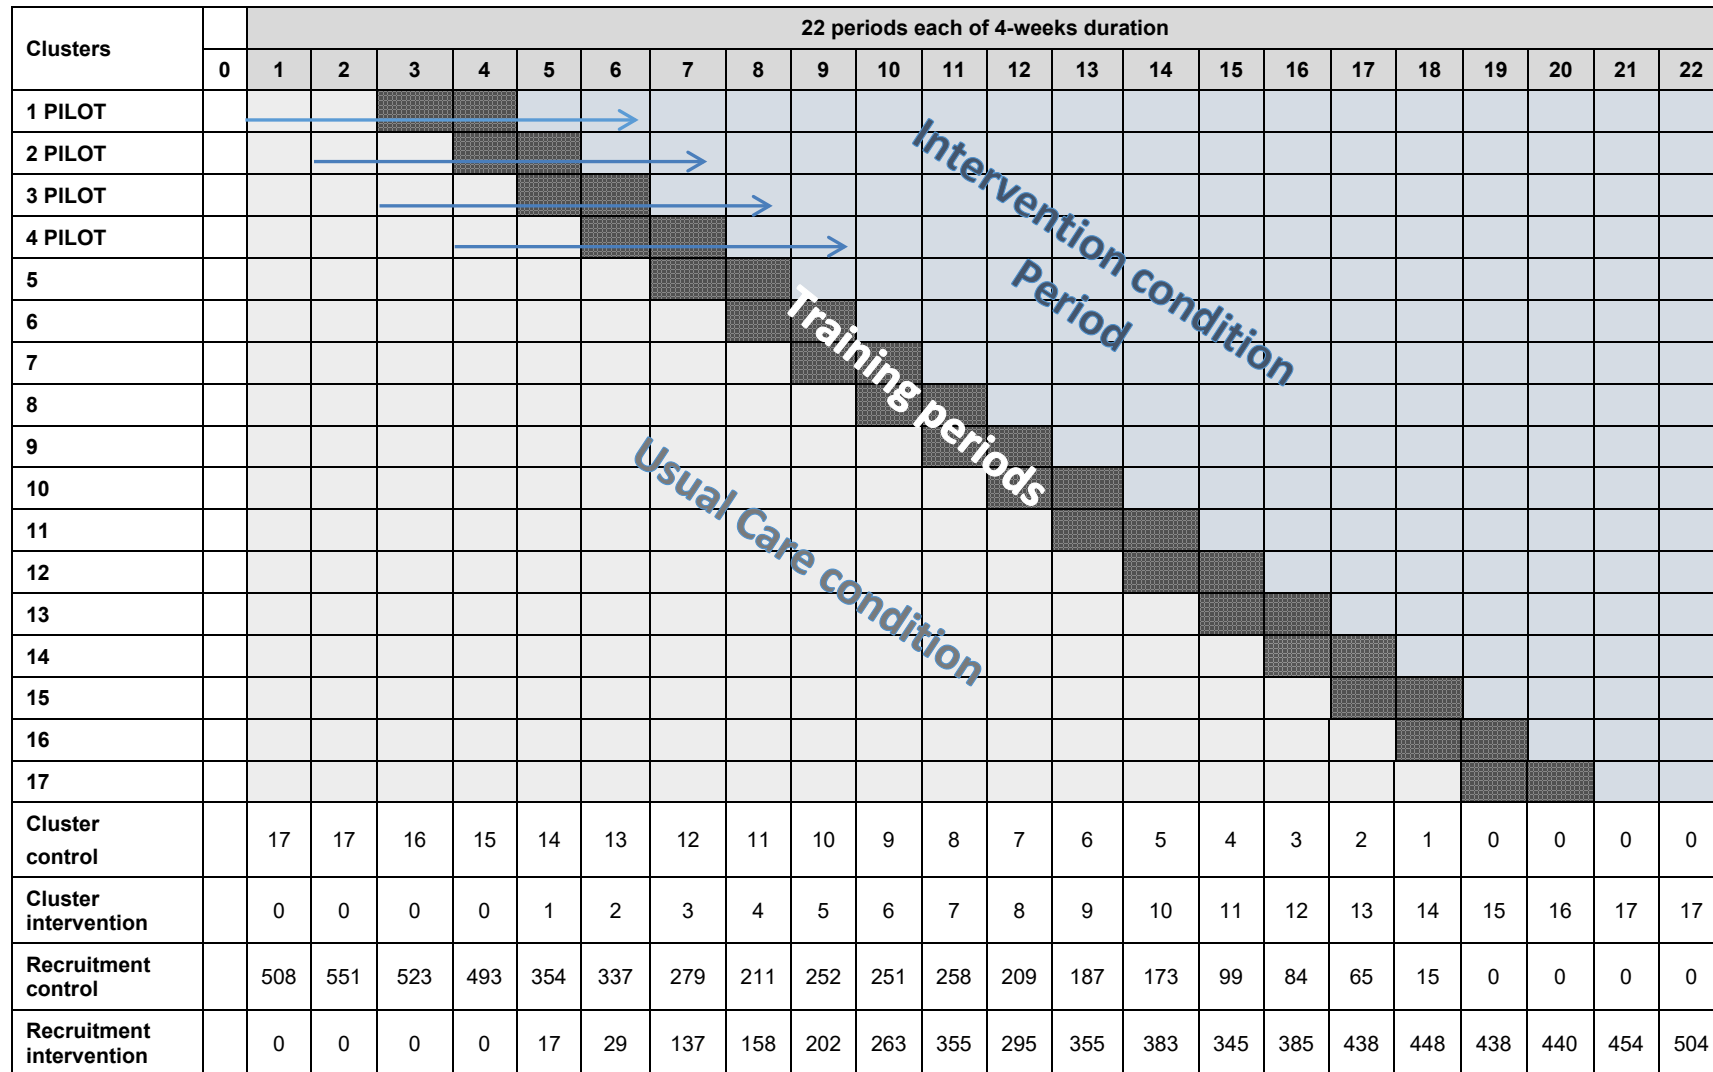

This cluster included two ICUs Each shaded column represents a 4-week period. The shaded cells represent the control condition (light) and the intervention condition (dark). The patterned cells represent the transition to the two training periods during which recruitment was suspended. Recruitment re-commenced when the ICU transitioned to the intervention condition. The internal pilot was conducted in the first four clusters that were randomized to transition to the intervention. In the two periods before, during and after training, data were collected on recruitment, opt-out, training targets, adherence to intervention components and feasibility of data collection procedures to assess progression. The decision to progress was made by the Trial Steering Committee and the NIHR

Health Technology Assessment programme. The internal pilot continued without interruption into the trial. Importantly no outcome data from the internal pilot was considered in determining the decision to progress and there was no change in the trial protocol between the internal pilot and the overall trial.

**eFigure 2.** PRagmatic-Explanatory Continuum Indicator Summary (PRECIS-2)<sup>10</sup>

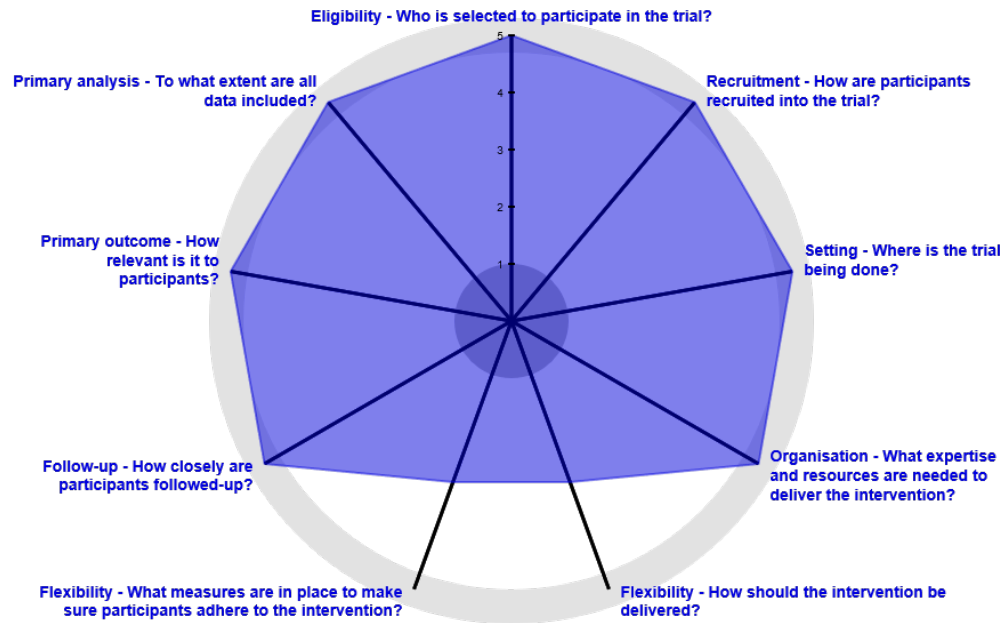

The 9 domains of trial design are scored from 1 (very explanatory, designed to demonstrate efficacy in “ideal conditions”) to 5 (very pragmatic, designed to assess effectiveness in “usual conditions”). The blue shading represents the design scores, demonstrating that the trial design is closer to pragmatic than explanatory. Explanation for the SANDWICH scores are below.

| <b>Explanation for the SANDWICH trial PRECIS-2 domain scores</b>                                                                                                                                                                                                                                                                                                                                                                                                                                                                                                           |
|----------------------------------------------------------------------------------------------------------------------------------------------------------------------------------------------------------------------------------------------------------------------------------------------------------------------------------------------------------------------------------------------------------------------------------------------------------------------------------------------------------------------------------------------------------------------------|
| Eligibility: All children who were intubated and mechanically ventilated were eligible unless there was a reason that they would not be extubated                                                                                                                                                                                                                                                                                                                                                                                                                          |
| Recruitment: All children meeting eligibility in participating pediatric ICUs were recruited                                                                                                                                                                                                                                                                                                                                                                                                                                                                               |
| Setting: Within the UK. 18 out of a total of 28 pediatric ICUs in the UK participated                                                                                                                                                                                                                                                                                                                                                                                                                                                                                      |
| Organisation: The intervention could be slotted into the usual organisation of care for mechanically ventilated children making use of no more than the existing healthcare staff and resources in that setting.                                                                                                                                                                                                                                                                                                                                                           |
| Flexibility, intervention delivery: Sedation assessment was delivered as per usual care, flexible in timing but with a minimum of 6-hourly assessment. Daily screening was delivered as prescribed by the protocol which was new to staff. A SBT was also prescribed and new to staff, although there was flexibility in clinically decisions about whether or not to proceed. The ward round was usual care, but added was the requirement to set targets for sedation levels and ventilation that were appropriate for the child and were fed back to the bedside nurse. |
| Flexibility, adherence: Fidelity to the intervention was measured. Feedback on adherence was fed back to the ICU at intervals to encourage greater adherence. There were no sanctions for non-adherence.                                                                                                                                                                                                                                                                                                                                                                   |
| Follow-up: All data were available electronically by medical records and the national registry for pediatric ICUs.                                                                                                                                                                                                                                                                                                                                                                                                                                                         |
| Primary outcome: Highly relevant confirmed in pre-trial work with parents and young people groups.                                                                                                                                                                                                                                                                                                                                                                                                                                                                         |
| Primary analysis: There were very few missing data on outcomes.                                                                                                                                                                                                                                                                                                                                                                                                                                                                                                            |

**eFigure 3.** Probability and time to successful extubation by observation period in all children

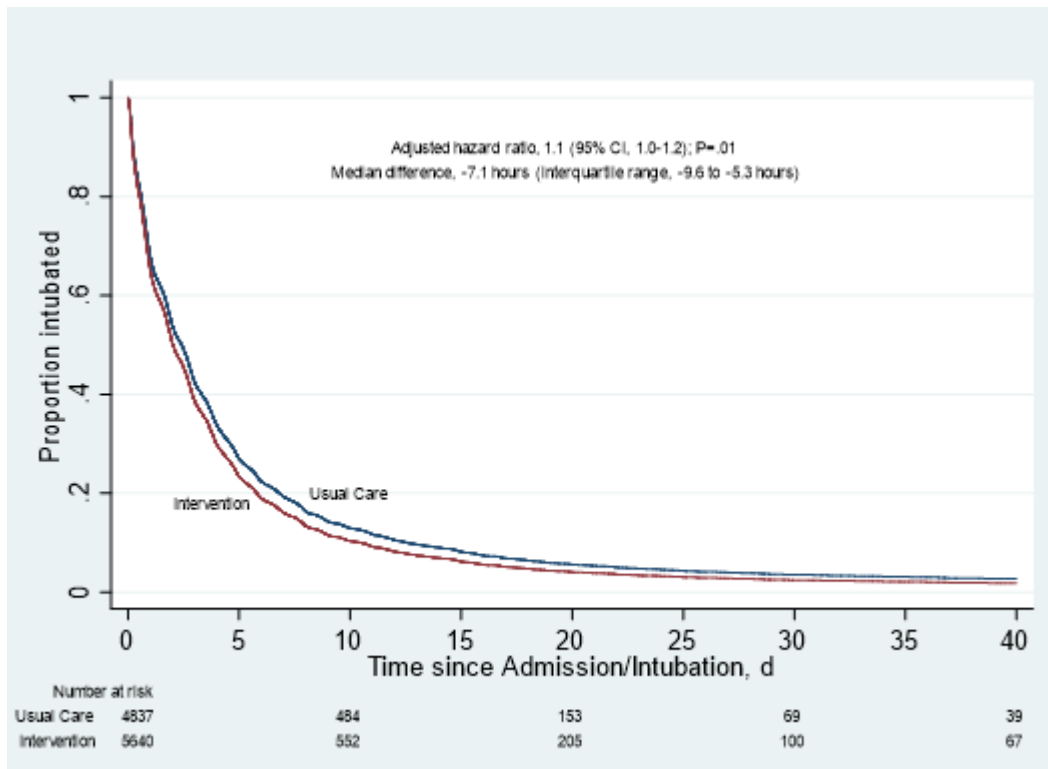

Footnote: The hazard ratio and the median difference (IQR) were adjusted for cluster and calendar time. Patients were observed from initiation of ventilation until the first successful extubation (defined as still breathing spontaneously for 48-hours after extubation). The curves on the graph are created using the adjusted figures. The risk table presents the absolute patient numbers and therefore will not match precisely with the covariate adjusted curve

**eFigure 4.** Subgroup analyses for time to successful extubation

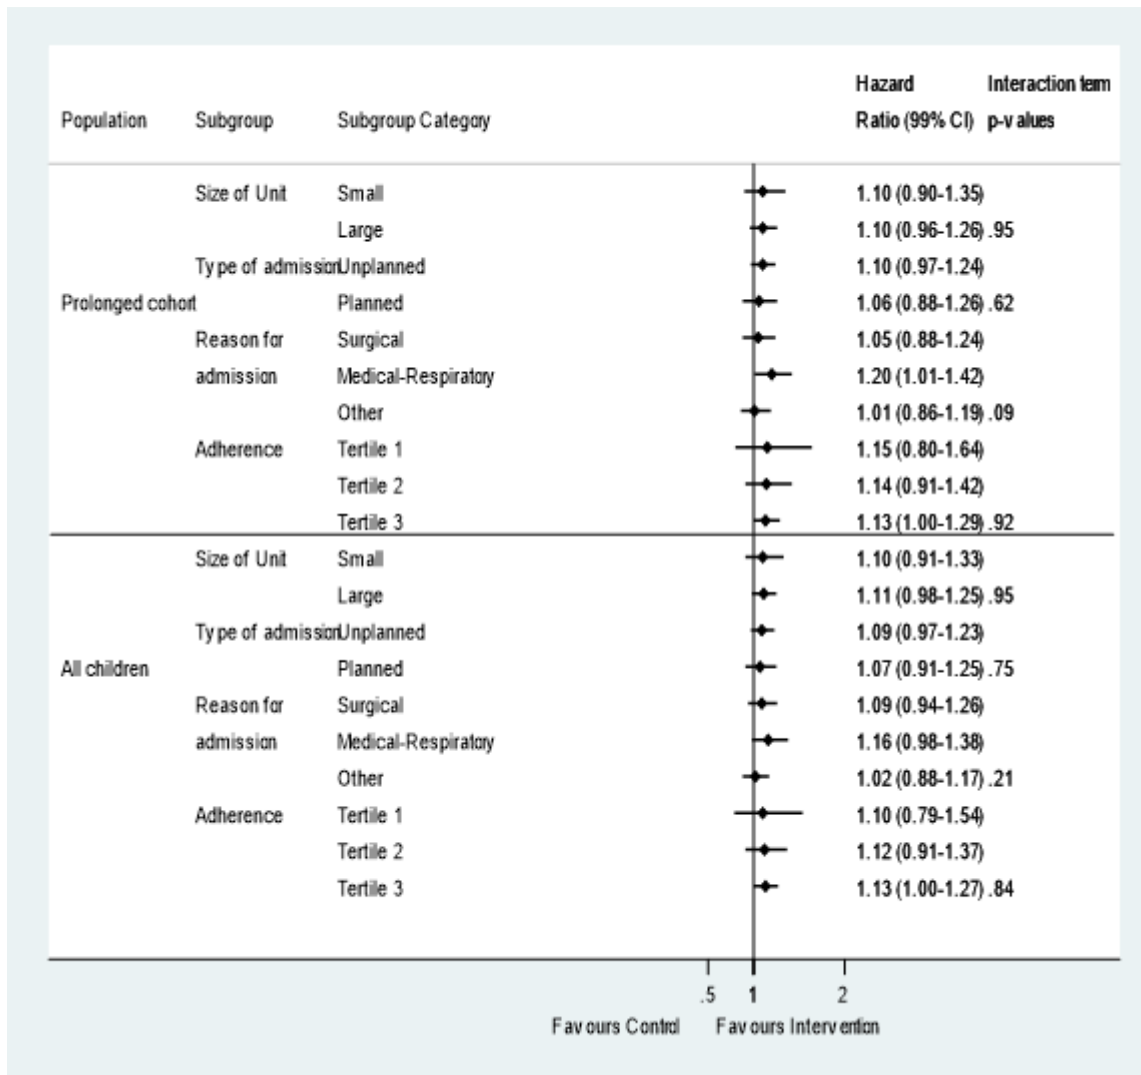



## eMethods

### Additional information on categorization of short and prolonged ventilation groups

Primarily, this pragmatic study was commissioned to address ventilator liberation in any child who could potentially benefit from earlier weaning. We deemed a one-day difference to be clinically important, so children with conditions that typically required less than one-day ventilation were less likely to benefit. We were careful not to define prolonged duration of IMV in terms of hours (as duration was the primary outcome). Thus, *a priori*, we defined prolonged as those children with diagnoses that typically required longer than 24-hours IMV. The definition and selection of prolonged cases was data-driven from the Paediatric and Intensive Care Audit Network (PICANet) database; a mandatory registry for pediatric ICU designation.<sup>1</sup>

Using historical PICANet data (accessed 30 Oct 2018), diagnostic codes associated with a short duration of IMV (24 hours or less) were identified and categorised as 'short'. Admissions that did not include a short diagnostic code were anticipated to have prolonged IMV and were categorised as 'prolonged'.

In total, there were 35,105 codes associated with a short ventilation time. They were classified into 11 categories.

1. Allergic reactions
2. Atrial septal defect
3. Atrial surgery/Mitral valve surgery
4. Aortic coarctation
5. Epilepsy
6. Fracture
7. Musculoskeletal surgery
8. Poisoning; drug overdose
9. Pulmonary vein abnormality
10. Scoliosis
11. Ventricular septal defect (isolated repair)

Due to the large number of diagnostic codes, it was not feasible to list diagnostic exclusions in the eligibility assessment for the study, therefore all children requiring IMV were included and subsequent analyses were conducted on both the 'prolonged' IMV cohort and all children

## The SANDWICH intervention

We used the template for intervention description and replication (TIDieR) checklist and guide to describe the intervention and aid replicability of the intervention and its delivery in practice<sup>2</sup>.

### Item 1. Name of the intervention

The name of the intervention was 'sedation and weaning in children, a coordinated care protocol' that was more informally known as the SANDWICH intervention.

### Item 2. Why: Describe any rationale, theory, or goal of the elements essential to the intervention

Sedation and weaning are inextricably linked and clinical coordination of care is an important priority, therefore it made sense to package these components together in a way that was not overly complicated: (a) daily evaluation of readiness for liberation incorporating a SBT; (b) sedation assessment and a strategy to minimise sedation; and (c) maximisation of engagement of staff. While the individual components have been evaluated separately, the evidence is limited due to the paucity of paediatric trials, and they have not been combined and evaluated in this particular way.

### Item 3. What (materials): Describe any physical or informational materials used in the intervention, including those provided to participants or used in intervention delivery or in training of intervention providers. Provide information on where the materials can be accessed (for example, online appendix, URL)

Materials are provided in the SANDWICH website <https://www.qub.ac.uk/sites/sandwich/>.

### Item 4. What (procedures): Describe each of the procedures, activities, and/or processes used in the intervention, including any enabling or support activities

The intervention incorporated co-ordinated care among the ICU multiprofessional team with greater nursing involvement in the sedation and ventilation weaning process. Formerly, bedside nurses had no formal involvement in the weaning process.<sup>3</sup> The intervention comprised four key components.

#### 1. Sedation assessment

Minimum 6-hourly assessment of sedation using one of two COMFORT tools undertaken by bedside nurses. The COMFORT Original has 8 score categories each scored between 1 and 5 based on behavioural and physiological values observed on the child. The total score is derived from adding each of the category scores resulting in a range from 8-40. During regular ward round review of sedation, the target range of scores within which the COMFORT score should lie were agreed according to the child's progress (e.g. during acute phase 13-17 range; during weaning phase 18-25 range)<sup>4</sup>.

The COMFORT Behavioural has 6 score categories each scored between 1 and 5 based on behaviours exhibited by the child. The total score is derived from adding each of the category scores resulting in a range from 6-30. During regular ward round review of sedation, the target range of scores within which the COMFORT B score should lie were agreed according to the child's progress (e.g. during acute phase 10-12 range; during weaning phase 12-17 range)<sup>5</sup>.

#### 2. Readiness for a spontaneous breathing trial (SBT)

This component was conducted twice-daily. Five clinical parameters were assessed to test the child's readiness for a SBT. The assessment was generally conducted by the bedside nurse and included the following:

- $FiO_2 \leq 0.45$
- $SpO_2 \geq 95\%$  (or as appropriate to underlying condition)

- positive end expiratory pressure (PEEP)  $\leq$  8cm H<sub>2</sub>O
- peak inspiratory pressure (PIP)  $\leq$  22cm H<sub>2</sub>O
- Cough present

When criteria were met, the nurse was instructed to stop or reduce sedation (as determined during the ward round) and inform a senior clinician (medical or nursing) that the child was potentially ready to undertake a 2-hour SBT. The decision to proceed was judged by the senior clinician.

### 3. Spontaneous breathing trial

If the senior clinician decided to proceed with the SBT, ventilator support was reduced to a PEEP of 5cmH<sub>2</sub>O and a pressure support of 5cmH<sub>2</sub>O (above PEEP).

During the SBT, the bedside nurse monitored the child for signs of respiratory distress:

- A 20% increase in heart or respiratory rate (above pre-SBT rates),
- Signs of increased work of breathing (use of accessory muscles, asynchronous breathing)
- SpO<sub>2</sub> < 92% or significant sustained increase in FiO<sub>2</sub> requirement

If the SBT was deemed successful (i.e. breathing spontaneously with no distress within the 2-hour trial), progression to extubation was discussed with medical staff.

### 4. Ward round clinical assessment

The multiprofessional clinical ward round was designed to facilitate greater inter-professional collaboration. It included nursing and medical disciplines, and others such as physiotherapy, pharmacy and dieticians according to usual practice in the ICU. Rounding provided the clinical team the opportunity to review patients' sedation management including the sedation assessment COMFORT scores, the sedative regimen and setting sedation targets. In addition, regular clinical review of the child's ventilation status was undertaken and ventilation goals were set. Daily sedation and ventilation targets were fed back to the child's bedside nurse and recorded on the daily bedside record.

## **Enabling and support activities**

### The SANDWICH education package

Creating an education package to train critical care staff to deliver each element of the intervention was a major focus of the study. The education package was created by the clinical research team with specialist support from an established NHS online education provider (LearnPro NHS: <http://www.learnpro.co.uk>) and a medical filmmaker from Temple St Hospital, Dublin, Ireland.

### Online course

The on-line course included inbuilt assessment of learning against objectives. It enabled tracking of staff training completion at the ICU level: this facilitated monitoring and feedback to trainers/researchers during the training and intervention periods. This approach was used successfully by co-applicant Walsh in the DESIST trial<sup>6</sup> in adult ICUs, to achieve >80% training completion within 2-3 months by nursing staff for a sedation-analgesia education package.

The course consisted of seven modules, four addressed the components of the intervention and two provided background education on the evidence underpinning protocolised weaning, optimum sedation management and pharmacology of the sedative and analgesic drugs commonly used in ICU. The topics covered included:

1. Why get sedation right?
2. Pharmacology of commonly used sedative drugs
3. COMFORT B \*<sup>5</sup>
4. COMFORT Original \*<sup>4</sup>
5. Multidisciplinary ward round

6. Bedside screen for SBT readiness
7. Spontaneous breathing trials

\* The e-learning module had two pathways to facilitate use of either COMFORT version.

Staff completed an assessment at the end of each four essential component modules. A score  $\geq 80\%$  was required in each module to obtain a training certificate.

#### SANDWICH manual

A detailed education manual was compiled to complement the online training; this included a PowerPoint slide set and training folder. Materials were designed using the same palette of fonts and colours, and included photographs, graphics and colourful diagrams. The manual comprised 136 pages, with sections on instructions for accessing the online e-learning course; face-to-face teaching resources including alternative teaching formats; standard operating procedures for training and assessment; and training logs. The manual was given to the ICU principle investigator and champion team on the first day of onsite training delivered by the implementation manager.

#### **Item 5. Who provided: For each category of intervention provider (for example, psychologist, nursing assistant), describe their expertise, background and any specific training given**

##### Intervention trainers

Implementation manager: an implementation manager was specifically funded by the trial to support and manage intervention training for local trainers over the course of the trial. The manager was a senior paediatric critical care registered nurse with 10 years paediatric ICU experience. She held a BSc in Nursing, MPhil and Postgraduate Higher Diploma in Paediatric Critical Care Nursing. Paediatric ICU trainers and SANDWICH champions: all trainers and champions were local ICU staff with current critical care expertise. They included:

- Clinical educators
- Critical care nurses (various grades)
- Critical care doctors (registrar to consultant level)
- Advanced nurse practitioners (ANP)
- Physiotherapists
- SANDWICH research nurses

Each individual received the full training from the implementation manager, and had responsibility for rolling out the full training or aspects of the training to other staff.

##### Intervention providers

All clinical staff within the ICU were the intervention providers. These included:

- Critical care nurses (all grades)
- Critical care doctors (all grades)
- Advanced nurse practitioners (ANP)
- Physiotherapists

Some staff had greater involvement in particular components. The ward round had multidisciplinary involvement of doctors, nurses and relevant other disciplines. There were generally two models of ward round: the bedside or in a separate room in the ICU. If conducted at the bedside, the bedside nurses would be included; if conducted in a separate room, a senior nurse would feedback relevant sedation and ventilation issues to and from the bedside nurse to the ward round attendees. COMFORT sedation assessment, readiness for SBT screening and conducting a SBT were generally undertaken by bedside nurses. However, decisions around sedation and ventilation target setting and proceeding to conduct a SBT or to extubate afterwards were generally

undertaken by senior medical staff or ANPs. The procedure for extubation was undertaken following standard unit procedure and was not prescribed in the SANDWICH protocol.

**Item 6. How: Describe the modes of delivery (such as face-to-face or by some other mechanism, such as internet or telephone) of the intervention and whether it was provided individually or in a group**

The SANDWICH intervention was delivered using a multi-faceted approach that included both on-line and face-to-face engagement (both individually and in groups). On-line education was delivered using an established NHS online education provider (LearnPro NHS: <http://www.learnpro.co.uk>). The on-line module provided training in the protocol and the underpinning clinical evidence supporting protocolised weaning. Video footage on COMFORT assessment was obtained by permission from Professor van Dijk (<http://www.comfortassessment.nl/web/>). The module included an inbuilt assessment of learning against objectives, and also enable training completion at ICU level to be tracked and fed back to local educators / researchers during the training and intervention periods. Face-to-face training was delivered by the implementation manager, ICU trainers, champions and the SANDWICH research nurses.

**Item 7. Where: Describe the type(s) of location(s) where the intervention occurred, including any necessary infrastructure or relevant features**

The intervention was delivered within UK paediatric ICUs. Training was delivered within ICUs either at the bedside or in training rooms within the ICU. The intervention involved greater engagement of junior nurses in the weaning processes. Within the UK setting, the term junior nurse refers to nurses within the Band 5 pay grade, but a nurse may be in this band for 5 years. In ICU, it generally includes nurses who do not have the recognised specialised paediatric ICU course, which can be undertaken after 1 to 2 years paediatric ICU experience. This intervention is relevant within an international context; particularly in countries where no such specialised course exists, thus this context is reflective of a wider international context.

**Item 8. When and how much: Describe the number of times the intervention was delivered and over what period of time including the number of sessions, their schedule, and their duration, intensity or dose**

The intervention training was provided over an 8-week training period, initially to trainers by the implementation manager, thereafter by trainers and champions. This was concentrated in the 8-week period, but was delivered locally with the arrival of new staff. The intervention itself was delivered daily for the duration of the trial after the ICU cross over to the intervention period.

**Item 9. Tailoring: If the intervention was planned to be personalised, titrated or adapted, then describe what, why, when, and how**

The duration and dose of the intervention components could not be adapted. However, the schedule of timing of ward rounds, readiness for SBT screening and sedation assessment could be personalised to suit the ICU working practices. The ward round could be within a room in the ICU or a bedside walk around at times that suited clinically, but were usually morning and afternoon. Screening could be undertaken by night staff before the end of their shift (i.e. early morning) and by day staff in the morning and afternoon. Screening was generally undertaken at times that enabled sufficient time to deliver a SBT and consider extubation if necessary. Sedation assessment was undertaken 6-hourly at times that coincided with the bedside nurse's assessment practices.

The SBT screening checklists could not be adapted, but could be incorporated into the ICU bedside computer monitoring programme if required.

**Item 10. Modifications: If the intervention was modified during the course of the study, describe the changes (what, why, when, and how)**

No modifications were made to the intervention during the trial.

**Item 11. How well (planned): If intervention adherence or fidelity was assessed, describe how and by whom, and if any strategies were used to maintain or improve fidelity, describe them**

Training: target 80% staff trained within 8-week period. Training was assessed both in-house and online. All staff were required to register and complete the online intervention training programme that incorporated assessments. The online programme monitored successful completion of training and assessments and generated progress reports. Within the 8-week training period, progress reports were fed back from the implementation manager to the local ICU research team on the numbers of staff who had completed. Research staff and champions were able to encourage untrained staff to complete training. Staff who successfully completed were provided with a certificate of completion. In-house, the ICU champions supplemented online training by providing face-to-face training. A record log was maintained in each ICU of training provided face-to-face. Progress reports and training logs were retained by the trial team.

Adherence was measured for the following five components of the intervention:

1. minimum\* of two COMFORT assessments/day
2. minimum\* of one SBT readiness screen
3. daily\* ventilation target set
4. daily\* sedation target set
5. SBT performed when criteria were met

(\* minimum requirements were chosen to capture all adherence, particularly for children admitted to ICU halfway through the day)

Research nurses collected the data on the daily data collection form during the intervention period. The total proportion for the intervention period was reported and the adherence rates were fed back to ICUs via the SANDWICH research nurses.

Adherence to training completion was measured at 8 and 12-weeks after the training period. The data were collected by the LearnPro programme team and numbers trained were reported to the implementation manager. Training rates were fed back to local unit trainers, the local PI and the research nurses at 8 and 12 weeks.

**Item 12: How well (actual): If intervention adherence or fidelity was assessed, describe the extent to which the intervention was delivered as planned**

Adherence is reported in the results section (intervention delivery) of the main paper, and accompanied by data in eTables 3, 4 and 5 in this supplement.

Following the report of the internal pilot period, we provided 3-monthly individual unit feedback on intervention adherence to the ICUs in the intervention phase (13 Mar 2019; 10 Jun 2019, 16 Sep 2019). Feedback was presented in a format enabling ICUs to compare their own adherence to that of other ICUs (anonymized) in the intervention phase. Additionally, during the trial's monthly intervention teleconferences (including ICU PIs, SANDWICH research nurses, the CI and research team), ICU teams discussed and shared strategies to enhance adherence.

## **Model based analysis plan for binary and secondary outcomes including detailed sensitivity analysis**

There are a number of requirements for the analysis model for this stepped-wedge cluster randomised trial. Firstly, this is a clustered trial and all analysis will take clustering into account. Secondly, the trial has 17 clusters, and the model will allow for a correction due to the small number of clusters. Thirdly, the design is a stepped-wedge study and we will adjust for temporal confounding. Full details on how each of these will be undertaken, with justification and detailed sensitivity analysis to all underlying assumptions, is provided below for all binary and continuous outcomes<sup>7</sup>.

### **Binary outcomes**

A mixed effects binomial regression with a log-link will be used to estimate the relative risk; and a binomial model with identity link used to estimate the risk difference, with estimation using REML. In the case of non-convergence of the binomial model with a log-link, a Poisson model with robust standard errors will be fitted. If the binomial model with the identity link does not converge then only a relative risk will be reported. If neither the log or identity link converge we will use the logistic link and report odds ratios. We will include fixed effects for period and a fixed effect for intervention exposure. The primary analysis will allow for clustering as a random effect assuming an exchangeable correlation structure. To correct the potential inflation of the type I error rate due to small number of clusters, the Kenward and Roger small sample correction will be used. NOTE: on request of editors at JAMA, in the case of non-convergence of binomial linear mixed models to estimate risk differences, we report marginal estimates of risk differences using generalised estimating equations, assuming an independent correlation structure, with a Fay and Graubard small sample correction on standard errors, with 95% confidence intervals derived from a z-distribution.<sup>8</sup>

### **Continuous outcomes**

For continuous outcomes we will report mean differences estimated from mixed effects linear regression with identity link. All continuous outcomes will be checked for normality and appropriate transformations used. All analysis other than choice of link function will take the same form above, including small sample corrections.

### **Additional sensitivity analyses**

In a sensitivity analysis we will explore if models with more complicated correlation structures are a better fit to the data. These models are not being used as our primary analysis models as there is limited understanding as to when such models will converge and how to choose between the various different correlation structures which might be plausible. To this end we will additionally fit generalised linear mixed models (with same link functions and fixed effects as described above) to include the following correlation structures: a block exchangeable correlation structure to include a random cluster and random cluster by period effect; and a discrete time decay correlation structure including a random cluster effect with auto-regressive structure (AR(1)). We will report AIC and log-likelihoods from all models so we can make an informal comparison of goodness of fit. Although there are currently no recommended models to formally compare goodness of fit between different correlation structures, any large differences in goodness of fit between these models should be evident from conventional goodness of fit statistics. Should there be large differences and differences between results (point estimates of treatment effects and confidence intervals, results will be interpreted cautiously).

To additionally explore if the categorical effect for time (i.e. fixed period effect) is both parsimonious and adequate to represent the extent of the secular trend, we will model the time effect using a spline function. The number of knots used here will be taken as the default. Again, for verification of results this model will also be fitted in Stata under the exchangeable correlation structure and without a small sample correction. Models will be extended to include random cluster by intervention effects (with a non-zero covariance term) to examine if results are sensitive to the assumption of no intervention by cluster interaction. Models will also be extended to include an interaction between treatment and number of periods since first treated, to examine if there is any indication of a relationship between duration of exposure to the intervention and outcomes.

### **Estimation and reporting of within cluster correlations**

We will report time adjusted within-cluster correlations for all outcomes. We will report correlations from the different assumed correlation structures (so we will report intra-cluster correlations (ICC); within and between-period correlations; and within-period correlations and exponential decay). As well as reporting correlations we will additionally report all variance components. For all outcomes (continuous and binary) we will report

correlations on the latent scale (i.e. proportions scale for binary outcomes) as is appropriate to inform future sample size calculations. To this end, to estimate the intra-cluster correlations, a linear mixed effects regression model with an identity-link will be fitted, with a random cluster effect and fixed period effect and fixed intervention effect. To report the estimated within-period ICC, between-period ICC assuming a block-exchangeable correlation structure we will fit a linear mixed effects regression model with an identity-link, with a random cluster and random cluster by period effect, and fixed period effect and fixed intervention effect. To report the within-period ICC and the rate of exponential decay under the discrete time decay correlation structure we will fit a linear mixed effects regression model with an identity-link, with a random cluster and auto-regressive structure (AR(1)), and fixed period effect and fixed intervention effect. No small sample corrections will be made when fitting models for intra-cluster correlation estimates as interest here is in the variance components and not the treatment effect.

### **Implementation**

These binary models will be fitted in SAS using proc glimmix because Stata both does not accommodate small sample corrections for binary outcomes and does not accommodate exponential correlation structures. However, binary outcomes will be analysed in Stata without the small sample correction and under the exchangeable correlation structure as a means of verification of results. For continuous outcomes analysis will again be in SAS using proc mixed (hpmixed for exponential decay to improve computational time) in Stata using mixed.



**eTable 1.** Usual care in participating pediatric ICUs

| ICU | Unit type                                                                      | Beds (N) | Sedation scoring tool  | Sedation protocol | Ventilation weaning protocol | ANPs |
|-----|--------------------------------------------------------------------------------|----------|------------------------|-------------------|------------------------------|------|
| 01  | General, cardiac                                                               | 21       | COMFORT B <sup>a</sup> | No                | No                           | Yes  |
| 02  | General                                                                        | 12       | COMFORT O <sup>b</sup> | No                | No                           | No   |
| 03  | General, cardiac, liver, neurosurgical, ECLS, ENT, oncology, metabolic, spinal | 29.5     | COMFORT B              | No                | Yes                          | Yes  |
| 04  | General, cardiac                                                               | 17       | COMFORT B              | No                | Yes                          | No   |
| 05  | Cardiac, respiratory                                                           | 16       | COMFORT O              | No                | No                           | Yes  |
| 06  | General                                                                        | 9        | COMFORT O              | No                | No                           | Yes  |
| 07  | General                                                                        | 6        | COMFORT O              | No                | No                           | Yes  |
| 08  | General, neonatal                                                              | 26       | COMFORT O              | No                | No                           | No   |
| 09  | Cardiac                                                                        | 19       | COMFORT O              | No                | No                           | Yes  |
| 10  | General                                                                        | 8        | COMFORT B              | Yes               | No                           | No   |
| 11  | General, cardiac                                                               | 16       | COMFORT B              | No                | No                           | Yes  |
| 12  | General                                                                        | 11       | Non-validated tool     | Yes               | No                           | No   |
| 13  | General, neurosurgical, craniofacial, major trauma                             | 8        | None                   | No                | No                           | Yes  |
| 14  | General, cardiac, neurosurgery                                                 | 14       | None                   | No                | No                           | Yes  |
| 15  | General, neurosurgical, oncology, surgical                                     | 6        | COMFORT B              | Yes               | No                           | No   |
| 16  | General                                                                        | 7        | Non-validated tool     | Yes               | No                           | No   |
| 17  | General                                                                        | 6.5      | None                   | No                | No                           | No   |
| 18  | General                                                                        | 9        | COMFORT B              | No                | Yes                          | Yes  |

ANPs, advanced nurse practitioners (includes skills in advanced airway management, extubation, prescribing, insertion of invasive devices); ECLS, extra corporeal life support; ECMO, extra corporeal membrane oxygenation

<sup>a</sup> COMFORT Behavioural tool<sup>5</sup>; <sup>b</sup> COMFORT Original tool<sup>4</sup>

**Additional information:** Sedation assessment was undertaken in the majority of ICUs (15, 83.3%): assessment periods varied. In all ICUs, the ICU consultant (attending) was primarily responsible for ventilator weaning decisions. Typically, weaning involved a slow reduction in ventilator support to very low levels of support prior to extubation. Very few ICUs (3, 16.7%) used a weaning protocol or a sedation protocol (3, 16.7%); no ICUs used both. No formal criteria, or use of SBTs, were used to assess readiness for ventilator liberation. Bedside nurses had no formal role in the weaning process.<sup>3</sup>

**eTable 2.** Characteristics of UK pediatric ICUs

| <b>Pediatric ICU characteristics</b> | <b>Participating ICUs<br/><i>n</i> (%)</b> | <b>Non-participating ICUs<br/><i>n</i> (%)</b> | <b>All UK pediatric ICUs</b> |
|--------------------------------------|--------------------------------------------|------------------------------------------------|------------------------------|
|                                      | <b><i>n</i> = 18 (64.3)</b>                | <b><i>n</i> = 10 (35.7)</b>                    | <b><i>N</i> = 28</b>         |
| Region                               |                                            |                                                |                              |
| North                                | 4 (14.3)                                   | 3 (10.7)                                       | 7 (25.0)                     |
| Midlands West/East                   | 3 (10.7)                                   | 3 (10.7)                                       | 6 (21.4)                     |
| London                               | 6 (21.4)                                   | 2 (7.1)                                        | 8 (28.6)                     |
| South West/East/Central              | 3 (10.7)                                   | 0                                              | 3 (10.7)                     |
| Wales <sup>a</sup>                   | 1 (3.6)                                    | 0                                              | 1 (3.6)                      |
| Northern Ireland <sup>a</sup>        | 1 (3.6)                                    | 0                                              | 1 (3.6)                      |
| Scotland <sup>b</sup>                | 0                                          | 2 (7.1)                                        | 2 (7.1)                      |
| Type of hospital                     |                                            |                                                |                              |
| University                           | 18 (64.3)                                  | 10 (35.7)                                      | 28 (100)                     |
| Size of unit (beds)                  |                                            |                                                |                              |
| <8                                   | 4 (14.3)                                   | 4 (14.3)                                       | 8 (28.6)                     |
| 8-11                                 | 5 (17.9)                                   | 2 (7.1)                                        | 7 (25.0)                     |
| 12-15                                | 2 (7.1)                                    | 2 (7.1)                                        | 4 (14.3)                     |
| >= 16                                | 7 (25.0)                                   | 2 (7.1)                                        | 9 (32.1)                     |
| Annual ICU admissions                |                                            |                                                |                              |
| <500                                 | 4 (14.3)                                   | 6 (21.4)                                       | 10 (35.7)                    |
| 500-749                              | 9 (32.1)                                   | 2 (7.1)                                        | 11 (39.3)                    |
| 750-999                              | 4 (14.3)                                   | 1 (3.6)                                        | 5 (17.9)                     |
| >= 1000                              | 1 (3.6)                                    | 1 (3.6)                                        | 2 (7.1)                      |

<sup>a</sup> Only one pediatric ICU in this country

<sup>b</sup> Scotland was legally restricted from using opt-out consent

Source <https://www.picanet.org.uk/wp-content/uploads/sites/25/2018/11/PICANet-2018-annual-report-summary-v1.1.pdf>

**eTable 3.** Characteristics of all patient admissions at baseline

| Characteristic                                             | Intervention Condition | Usual Care       |
|------------------------------------------------------------|------------------------|------------------|
| Total no.                                                  | 5646                   | 4849             |
| Female sex – no. (%)                                       | 2426 (43.0)            | 2048 (42.2)      |
| Male sex – no. (%)                                         | 3217 (57.0)            | 2800 (57.7)      |
| Age at ICU admission median (IQR), months                  | 9 (1, 54)              | 10.5 (2, 52)     |
| No. (%)                                                    |                        |                  |
| Less than 1 month                                          | 1078 (19.1)            | 802 (16.5)       |
| 1 to less than 24 months                                   | 2463 (43.6)            | 2245 (46.3)      |
| 24 to less than 72 months                                  | 940 (16.7)             | 832 (17.2)       |
| 72 months or greater                                       | 1165 (20.6)            | 968 (20.0)       |
| Previous ICU admission – no. (%)                           | 1523 (27.0)            | 1176 (24.2)      |
| Pediatric Index of Mortality 3 <sup>a</sup> – median (IQR) | 0.02 (0.01-0.05)       | 0.01 (0.01-0.05) |
| Primary diagnostic group – no. (%)                         |                        |                  |
| Cardiovascular                                             | 2105 (37.3)            | 1586 (32.7)      |
| Respiratory                                                | 1410 (25.0)            | 1289 (26.6)      |
| Neurological                                               | 734 (13.0)             | 672 (13.9)       |
| Other                                                      | 713 (12.6)             | 573 (11.8)       |
| Gastroenterology                                           | 316 (5.6)              | 294 (6.1)        |
| Infection                                                  | 255 (4.5)              | 309 (6.4)        |
| Oncology                                                   | 113 (2.0)              | 126 (2.6)        |
| Type of admission – no. (%)                                |                        |                  |
| Planned, following surgery                                 | 2074 (36.7)            | 1507 (31.1)      |
| Unplanned, following surgery                               | 244 (4.3)              | 268 (5.5)        |
| Planned, medical                                           | 283 (5.0)              | 167 (3.4)        |
| Unplanned, medical                                         | 3045 (53.9)            | 2907 (59.9)      |
| Anticipated ventilation trajectory <sup>b</sup> – no. (%)  |                        |                  |
| Prolonged                                                  | 4688 (83.0)            | 4155 (85.7)      |
| Short                                                      | 958 (17.0)             | 694 (14.3)       |

<sup>a</sup> Pediatric Index of Mortality 3 (PIM3) is a predictive model based on ten explanatory variables collected at the time of admission to intensive care to estimate the probability of death. Reporting an index ranging from 0 to 1, the higher the index, the higher the estimated probability of death.

<sup>b</sup> children's anticipated ventilation trajectory was defined using historical PICANet data. Diagnostic codes associated with a short duration of invasive ventilation (<24 hours) were identified and categorised as 'short'. Admissions that did not include a short diagnostic code were categorised as 'prolonged'.

**eTable 4.** Proportion (%) of staff trained within 8 and 12 weeks at each hospital site

| Hospital site ID | Total 8-weeks (n) | Trained 8-week (n) | %          | Total 12-weeks (n) | Trained 12-weeks (n) | %          |
|------------------|-------------------|--------------------|------------|--------------------|----------------------|------------|
| S08/09           | 369               | 346                | 94%        | 372                | 335                  | 90%        |
| S03              | 309               | 183                | 59%        | 282                | 223                  | 79%        |
| S01              | 213               | 191                | 90%        | 213                | 192                  | 90%        |
| S04              | 142               | 129                | 91%        | 142                | 129                  | 91%        |
| S14              | 132               | 114                | 86%        | 132                | 114                  | 86%        |
| S13              | 115               | 97                 | 84%        | 115                | 103                  | 90%        |
| S18              | 108               | 92                 | 85%        | 111                | 98                   | 88%        |
| S11              | 116               | 96                 | 83%        | 116                | 97                   | 84%        |
| S05              | 108               | 87                 | 81%        | 108                | 87                   | 81%        |
| S02              | 88                | 70                 | 80%        | 88                 | 70                   | 80%        |
| S12              | 96                | 83                 | 86%        | 96                 | 83                   | 86%        |
| S15              | 82                | 62                 | 76%        | 80                 | 70                   | 88%        |
| S06              | 84                | 76                 | 90%        | 96                 | 92                   | 96%        |
| S16              | 83                | 68                 | 82%        | 94                 | 84                   | 89%        |
| S10              | 78                | 61                 | 78%        | 78                 | 68                   | 87%        |
| S07              | 71                | 57                 | 80%        | 71                 | 57                   | 80%        |
| S17              | 53                | 53                 | 100%       | 53                 | 53                   | 100%       |
| <b>Totals</b>    | <b>2247</b>       | <b>1865</b>        | <b>83%</b> | <b>2247</b>        | <b>1955</b>          | <b>87%</b> |

All staff were required to register and complete the online intervention training programme that incorporated assessments. The online programme monitored successful completion of training and assessments and generated progress reports.

**eTable 5.** Proportion (%) of intervention adherence at each hospital site

| Hospital site ID | COMFORT assessed | Target set COMFORT | Target set ventilation | Readiness for SBT assessed | SBT initiated | Training target | Reach* | Average |
|------------------|------------------|--------------------|------------------------|----------------------------|---------------|-----------------|--------|---------|
| S16              | 93.5             | 98.3               | 99.1                   | 81.5                       | 54.8          | 82              | 88.6   | 85.4    |
| S17              | 88.0             | 92.0               | 96.0                   | 70.8                       | 60.0          | 100             | 82.3   | 84.2    |
| S18              | 90.9             | 93.5               | 95.9                   | 84.2                       | 53.0          | 85              | 74.5   | 82.4    |
| S15              | 96.9             | 96.5               | 98.4                   | 63.3                       | 51.9          | 76              | 76.7   | 80.0    |
| S02              | 84.1             | 89.1               | 91.6                   | 66.0                       | 48.4          | 80              | 92.5   | 78.8    |
| S01              | 82.0             | 87.4               | 87.3                   | 89.9                       | 21.6          | 90              | 88.3   | 78.1    |
| S13              | 81.6             | 89.3               | 91.8                   | 74.5                       | 38.5          | 84              | 86.8   | 78.1    |
| S08/09           | 84.7             | 81.5               | 89.95                  | 62.6                       | 39.2          | 94              | 86.6   | 76.95   |
| S06              | 69.8             | 65.2               | 95.0                   | 81.0                       | 50.6          | 90              | 82.3   | 76.3    |
| S05              | 90.7             | 87.1               | 81.4                   | 54.0                       | 32.0          | 81              | 100.0  | 75.2    |
| S12              | 83.1             | 82.4               | 82.6                   | 72.5                       | 33.1          | 86              | 78.0   | 74.0    |
| S04              | 79.3             | 62.5               | 88.0                   | 61.3                       | 45.4          | 91              | 89.5   | 73.9    |
| S11              | 75.8             | 77.5               | 73.6                   | 86.8                       | 29.5          | 83              | 71.9   | 71.2    |
| S07              | 77.5             | 63.2               | 96.3                   | 76.1                       | 19.8          | 80              | 75.3   | 69.7    |
| S10              | 94.0             | 34.8               | 34.8                   | 92.5                       | 44.7          | 78              | 72.6   | 64.5    |
| S03              | 81.8             | 53.7               | 56.8                   | 83.4                       | 15.0          | 59              | 85.3   | 62.1    |
| S14              | 83.2             | 39.1               | 28.1                   | 66.8                       | 30.8          | 86              | 80.1   | 59.2    |

Adherence was measured by capturing whether or not COMFORT was assessed at least twice daily; daily ward round targets were set for sedation and ventilation; readiness for SBT was assessed at least daily; an SBT was initiated when criteria were met; and the proportion of staff trained at the end of the eight week training period.

\*Reach, defined as the extent to which a target population came into contact with the intervention<sup>9</sup>, was measured by the proportion of patients screened (recruits and exclusions) divided by IMV admission patients (reported by PICANet over the trial period).

**eTable 6.** Reasons provided for not progressing to conduct a spontaneous breathing trial when the screening criteria were satisfied

| <b>Reason</b>                                | <b>N (%)</b>  |
|----------------------------------------------|---------------|
| Neuromuscular weakness                       | 432 (3.89)    |
| Low consciousness: sedation or neurological  | 1631 (14.68)  |
| Airway protection reasons: secretion, oedema | 2717 (24.45)  |
| High haemodynamic support                    | 1100 (9.90)   |
| Expected return to theatre                   | 1545 (13.90)  |
| Limited staff resources                      | 210 (1.89)    |
| Too late in the evening                      | 351 (3.16)    |
| <b>Other reasons<sup>a</sup></b>             |               |
| Child's condition                            | 650 (5.85)    |
| Awaiting external specialist review          | 106 (0.95)    |
| Awaiting hospital transfer                   | 56 (0.50)     |
| Long term ventilation or palliative care     | 47 (0.42)     |
| Self extubated prior to planned SBT          | 39 (0.39)     |
| Prioritizing weight gain                     | 106 (0.95)    |
| Awaiting further investigation               | 36 (0.32)     |
| Non-adherence                                | 1072 (9.65)   |
| No reason provided                           | 941 (8.47)    |
| Unobtainable                                 | 75 (0.68)     |
| <b>Total</b>                                 | <b>11,114</b> |

**eTable 7.** Reasons provided for not progressing to extubation when the spontaneous trial was successful

| <b>Reason</b>                                | <b>N (%)</b> |
|----------------------------------------------|--------------|
| Neuromuscular weakness                       | 45 (3.13)    |
| Low consciousness: sedation or neurological  | 251 (17.47)  |
| Airway protection reasons: secretion, oedema | 341 (23.73)  |
| High hemodynamic support                     | 27 (1.88)    |
| Expected return to theatre                   | 177 (12.32)  |
| Limited staff resource                       | 153 (10.65)  |
| Too late in the evening                      | 137 (9.53)   |
| <b>Other reasons<sup>a</sup></b>             |              |
| Child's condition                            | 87 (6.05)    |
| Awaiting external specialist review          | 25 (1.74)    |
| Awaiting hospital transfer                   | 6 (0.42)     |
| Palliative care                              | 3 (0.21)     |
| Self extubation                              | 3 (0.21)     |
| Awaiting further tests                       | 10 (0.70)    |
| Incomplete fasting period                    | 7 (0.49)     |
| Non-adherence                                | 90 (6.26)    |
| No reason provided                           | 75 (5.22)    |
| <b>Total</b>                                 | <b>1437</b>  |

<sup>a</sup> Other reasons were provided in free-form text. These reasons were content analysed and categorised by authors LMcl, and LT.



**eTable 8. Outcomes for all children**

| Main Clinical Outcomes                                                                               | Observation period            |                            | Adjusted analyses <sup>a</sup>             |         |                                     |         |
|------------------------------------------------------------------------------------------------------|-------------------------------|----------------------------|--------------------------------------------|---------|-------------------------------------|---------|
|                                                                                                      | Intervention<br>(n = 5646)    | Usual Care<br>(n = 4849)   | Absolute Scale                             |         | Relative Scale                      |         |
|                                                                                                      | Median (IQR) hours            |                            | Median Difference (IQR) Hours <sup>b</sup> | P value | Hazard Ratio (95%CI)                | P value |
| <b>Primary Outcome</b>                                                                               |                               |                            |                                            |         |                                     |         |
| Duration of invasive mechanical ventilation until 1 <sup>st</sup> successful extubation <sup>c</sup> | 51.4 (17.0-123.6)<br>(n=5640) | 55.2 (18.0-123.6) (n=4837) | -7.1 (-9.6- -5.3)                          | 0.01    | 1.1 (1.0-1.2)                       | 0.01    |
|                                                                                                      | Median (IQR) days             |                            | Median Difference (IQR) Days <sup>b</sup>  | P value | Hazard Ratio (95%CI)                | P value |
| <b>Secondary Outcomes</b>                                                                            |                               |                            |                                            |         |                                     |         |
| Total duration of invasive mechanical ventilation <sup>c</sup>                                       | 2.2 (0.7-5.5) (n=5640)        | 2.4 (0.8-5.5) (n=4837)     | -0.28(-0.33- -0.20)                        | 0.03    | 1.09 (1.01-1.18)                    | 0.03    |
| Duration post-extubation non-invasive ventilation <sup>c</sup>                                       | 1.8 (0.7-6.5) (n=911)         | 2.0 (0.7-6.3) (n=613)      | 0.12(0.10-0.16)                            | 0.67    | 0.95 (0.75-1.19)                    | 0.67    |
| Pediatric ICU length of stay                                                                         | 5.0 (3.0-9.0) (n=5646)        | 5.0 (3.0-9.0) (n=4849)     | 0.00(0.00-0.00)                            | 0.83    | 0.99 (0.92-1.07)                    | 0.83    |
| Hospital length of stay                                                                              | 8.4 (4.5-17.9)<br>(n=4922)    | 8.4 (4.9-17.6) (n=4236)    | 0.59(0.41-0.79)                            | 0.02    | 0.91 (0.84-0.99)                    | 0.02    |
|                                                                                                      | N(%)                          |                            | % Point Difference (95% CI)                |         | Relative Risk (95% CI) <sup>d</sup> |         |
| Successful extubation <sup>e</sup>                                                                   | 5092 (98.6) (n=5163)          | 4466 (98.6) (n=4530)       | 0.87(-0.14-1.89)                           | 0.09    | 1.01 (1.00-1.02)                    | 0.07    |
| Unplanned extubation                                                                                 | 167 (3.0) (n=5646)            | 123 (2.5) (n=4849)         | 0.85(-0.36-2.07)                           | 0.17    | 1.58 (1.05-2.37)                    | 0.03    |
| Reintubation <sup>f</sup>                                                                            | 600 (10.6) (n=5646)           | 551 (11.4) (n=4849)        | -0.11(-3.16-2.94)                          | 0.95    | 1.09 (0.89-1.33)                    | 0.42    |
| Post-extubation non-invasive ventilation                                                             | 916 (17.5) (n=5226)           | 616 (13.5) (n=4570)        | 8.19(3.53-12.84)                           | 0.001   | 1.22 (1.01-1.49)                    | 0.04    |
| Tracheostomy <sup>g,h</sup>                                                                          | 48 (0.9) (n=5646)             | 34 (0.7) (n=4849)          | 0.17(-0.21-0.54)                           | 0.38    | 0.84 (0.34-2.07)                    | 0.71    |
| Post-extubation stridor <sup>i</sup>                                                                 | 512 (9.1) (n=5646)            | 423 (8.7) (n=4849)         | 2.88(-2.21-7.97)                           | 0.27    | 0.91 (0.72-1.16)                    | 0.45    |
| Pediatric ICU mortality                                                                              | 230 (4.1) (n=5639)            | 186 (3.8) (n=4848)         | 0.00(-2.16-2.16)                           | 1.00    | 1.01 (0.70-1.46)                    | 0.94    |
| Hospital mortality <sup>j</sup>                                                                      | 282 (5.4) (n=5204)            | 213 (4.8) (n=4454)         | 0.44(-2.38-3.25)                           | 0.76    | 1.13 (0.80-1.58)                    | 0.49    |

Footnotes:

a All outcomes were adjusted for cluster (pediatric ICU) and calendar time (period categorical effect).

b Median differences and IQR were calculated across the 22 time periods

c Time-to-event outcomes were censored at the point of transitioning from usual care to the training period, discharge to another hospital, at 90-days, death, and point of receiving a tracheostomy.

d The Poisson regression with robust standard errors (to correct for misspecification of Poisson distribution for binomial distribution) was used to estimate the Relative Risk

e Percentage successful extubations in patients where extubation was attempted. An extubation that did not require reintubation within a 48-hour time period was considered successful.

f Percentage point difference estimated using a mixed effects binomial model with identity link. All other outcomes, percentage point difference was estimated using generalised estimating equations

g Due to lack of convergence, marginal estimates of risk difference were developed without using a small sample correction

h During the study period

i Laryngeal edema, resulting in stridor upon extubation

j Includes ICU mortalityf The binomial regression model with a small sample correction failed to converge, therefore the Poisson regression with robust standard errors (to correct for misspecification of Poisson distribution for binomial distribution) was used to estimate the Relative Risk.

g Laryngeal edema, resulting in stridor upon extubation; h Includes ICU mortality

**eTable 9.** Intra-cluster Correlation Coefficient variance components

| Main Clinical Outcomes              | Intra-cluster correlation coefficient (95% CI) |
|-------------------------------------|------------------------------------------------|
| <b>Prolonged ventilation cohort</b> |                                                |
| Successful extubation               | 0.001 (0.0001-0.013)                           |
| Unplanned extubation                | 0.003 (0.001-0.008)                            |
| Reintubation                        | 0.017 (0.008-0.038)                            |
| Incidence post-extubation NIV       | 0.050 (0.026-0.096)                            |
| Tracheostomy insertion              | 0.004 (0.001-0.012)                            |
| Post-extubation stridor             | 0.042 (0.021-0.082)                            |
| PICU mortality                      | 0.007 (0.003-0.016)                            |
| Hospital mortality                  | 0.009 (0.004-0.020)                            |
| <b>All children</b>                 |                                                |
| Successful extubation               | 0.001 (0.0002-0.007)                           |
| Unplanned extubation                | 0.002 (0.001-0.007)                            |
| Reintubation                        | 0.011 (0.005-0.026)                            |
| Incidence post-extubation NIV       | 0.040 (0.021-0.078)                            |
| Tracheostomy insertion              | 0.004 (0.001-0.011)                            |
| Post-extubation stridor             | 0.045 (0.023-0.085)                            |
| PICU mortality                      | 0.007 (0.003-0.015)                            |
| Hospital mortality                  | 0.009 (0.004-0.020)                            |

The ICC describes how strongly observations within a cluster resemble each other. The ICC index ranges from 0 (the observations within clusters are no more similar than observations from different clusters) to 1 (all observations in a cluster are identical). To estimate the intra-cluster correlations, a linear mixed effects regression model with an identity-link was fitted, with a random cluster effect and fixed period effect and fixed intervention effect.

**eTable 10.** Adverse and serious adverse events (prolonged ventilation cohort)

| Events         |                             | Number of Events |                    |                  | Number of Patients |                    |                  |
|----------------|-----------------------------|------------------|--------------------|------------------|--------------------|--------------------|------------------|
|                |                             | Total N          | Intervention n (%) | Usual Care n (%) | Total N (%)        | Intervention n (%) | Usual Care n (%) |
| <b>SAEs</b>    | <b>Total</b>                | 43               | 18 (41.9)          | 25 (58.1)        | 41 (0.5)           | 18 (0.4)           | 22 (0.6)         |
|                | Related <sup>a</sup>        | 3                | 3 (100)            | 0 (0)            | 3 (0.03)           | 3 (0.1)            | 0 (0)            |
|                | <b>Category</b>             |                  |                    |                  |                    |                    |                  |
|                | Cardiovascular              | 5                | 3 (60.0)           | 2 (40.0)         | 5 (0.1)            | 3 (0.1)            | 2 (0.1)          |
|                | Dislodgement (non-vascular) | 9                | 2 (22.2)           | 7 (77.8)         | 7 (0.1)            | 2 (0.04)           | 5 (0.1)          |
|                | Dislodgement (vascular)     | 3                | 1 (33.3)           | 2 (66.7)         | 3 (0.03)           | 1 (0.02)           | 2 (0.1)          |
|                | Other                       | 1                | 1 (100)            | 0 (0)            | 1 (0.01)           | 1 (0.02)           | 0 (0)            |
|                | Respiratory <sup>b</sup>    | 20               | 9 (45.0)           | 11 (55.0)        | 20 (0.2)           | 9 (0.2)            | 11 (0.3)         |
| Thromboembolic | 5                           | 2 (40.0)         | 3 (60.0)           | 5 (0.1)          | 2 (0.04)           | 3 (0.1)            |                  |
| <b>AEs</b>     | <b>Total</b>                | 279              | 113 (40.5)         | 166 (59.5)       | 224 (2.5)          | 88 (1.9)           | 136 (3.3)        |
|                | Related                     | 17               | 15 (88.2)          | 2 (11.8)         | 15 (0.2)           | 13 (0.3)           | 2 (0.1)          |
|                | Allergy                     | 2                | 0 (0)              | 2 (100)          | 2 (0.02)           | 0 (0)              | 2 (0.1)          |
|                | Cardiovascular              | 12               | 4 (33.3)           | 8 (66.7)         | 12 (0.1)           | 4 (0.1)            | 8 (0.2)          |
|                | Dislodgement (non-vascular) | 68               | 29 (42.7)          | 39 (57.4)        | 52 (0.6)           | 23 (0.5)           | 29 (0.7)         |
|                | Dislodgement (vascular)     | 100              | 53 (53.0)          | 47 (47.0)        | 89 (1.0)           | 43 (0.9)           | 46 (1.1)         |
|                | Infection                   | 6                | 0 (0)              | 6 (100)          | 6 (0.1)            | 0 (0)              | 6 (0.1)          |
|                | Metabolic                   | 3                | 0 (0)              | 3 (100)          | 3 (0.03)           | 0 (0)              | 3 (0.1)          |
|                | Neurological                | 6                | 0 (0)              | 6 (100)          | 6 (0.1)            | 0 (0)              | 6 (0.1)          |
|                | Other                       | 3                | 1 (33.3)           | 2 (66.7)         | 3 (0.03)           | 1 (0.02)           | 2 (0.1)          |
|                | Respiratory <sup>b</sup>    | 68               | 20 (29.4)          | 48 (70.6)        | 61 (0.7)           | 20 (0.4)           | 41 (1.0)         |
|                | Skin/Mucus Membranes        | 7                | 5 (71.4)           | 2 (28.6)         | 7 (0.1)            | 5 (0.1)            | 2 (0.1)          |
|                | Thromboembolic              | 5                | 2 (40.0)           | 3 (60.0)         | 5 (0.1)            | 2 (0.04)           | 3 (0.1)          |

AE, adverse event; SAE, Serious Adverse Event; (a) Where an event is assessed as possibly, probably or definitely related, the event is considered 'related' to the SANDWICH intervention. These events were possibly related and were expected events as listed in the study protocol; (b) the most common respiratory reason was hypoxia

**eTable 11.** Adverse and serious adverse events (all children)

| Events      | Number of Events            |                    |                  | Number of Patients |                    |                  |           |
|-------------|-----------------------------|--------------------|------------------|--------------------|--------------------|------------------|-----------|
|             | Total N                     | Intervention n (%) | Usual Care n (%) | Total N (%)        | Intervention n (%) | Usual Care n (%) |           |
| <b>SAEs</b> | <b>Total</b>                | 47                 | 21 (44.7)        | 26 (55.3)          | 44 (0.4)           | 20 (0.3)         | 24 (0.5)  |
|             | Related <sup>a</sup>        | 3                  | 3 (100)          | 0 (0)              | 3 (0.03)           | 3 (0.1)          | 0 (0)     |
|             | <b>Category</b>             |                    |                  |                    |                    |                  |           |
|             | Cardiovascular              | 5                  | 3 (60.0)         | 2 (40.0)           | 5 (0.05)           | 3 (0.1)          | 2 (0.04)  |
|             | Dislodgement (non-vascular) | 11                 | 4 (36.4)         | 7 (63.6)           | 8 (0.1)            | 3 (0.1)          | 5 (0.1)   |
|             | Dislodgement (vascular)     | 4                  | 1 (25.0)         | 3 (75.0)           | 4 (0.04)           | 1 (0.02)         | 3 (0.1)   |
|             | Other                       | 1                  | 1 (100)          | 0 (0)              | 1 (0.01)           | 1 (0.02)         | 0 (0)     |
|             | Respiratory <sup>b</sup>    | 21                 | 10 (47.6)        | 11 (52.4)          | 21 (0.2)           | 10 (0.2)         | 11 (0.2)  |
|             | Thromboembolic              | 5                  | 2 (40.0)         | 3 (60.0)           | 5 (0.1)            | 2 (0.04)         | 3 (0.1)   |
| <b>AEs</b>  | <b>Total</b>                | 305                | 128 (42.0)       | 177 (58.0)         | 242 (2.3)          | 96 (1.7)         | 146 (3.0) |
|             | Related                     | 18                 | 16 (88.9)        | 2 (11.1)           | 16 (0.1)           | 14 (0.3)         | 2 (0.04)  |
|             | Related and unexpected      | 1                  | 1 (100)          | 0 (0)              | 1 (0.01)           | 1 (0.02)         | 0 (0)     |
|             | Allergy                     | 2                  | 0 (0)            | 2 (100)            | 2 (0.02)           | 0 (0)            | 2 (0.04)  |
|             | Cardiovascular              | 12                 | 4 (33.3)         | 8 (66.7)           | 12 (0.1)           | 4 (0.1)          | 8 (0.2)   |
|             | Dislodgement (non-vascular) | 75                 | 34 (45.3)        | 41 (54.7)          | 57 (0.5)           | 26 (0.5)         | 31 (0.6)  |
|             | Dislodgement (vascular)     | 114                | 62 (54.4)        | 52 (45.6)          | 99 (0.9)           | 48 (0.9)         | 51 (1.0)  |
|             | Infection                   | 6                  | 0 (0)            | 6 (100)            | 6 (0.1)            | 0 (0)            | 6 (0.1)   |
|             | Metabolic                   | 5                  | 0 (0)            | 5 (100)            | 5 (0.05)           | 0 (0)            | 5 (0.1)   |
|             | Neurological                | 6                  | 0 (0)            | 6 (100)            | 6 (0.1)            | 0 (0)            | 6 (0.1)   |
|             | Other                       | 3                  | 1 (33.3)         | 2 (66.7)           | 3 (0.03)           | 1 (0.02)         | 2 (0.04)  |
|             | Respiratory <sup>b</sup>    | 71                 | 21 (29.6)        | 50 (70.4)          | 64 (0.6)           | 21 (0.4)         | 43 (0.9)  |
|             | Skin/Mucus Membranes        | 8                  | 6 (75.0)         | 2 (25.0)           | 8 (0.1)            | 6 (0.1)          | 2 (0.04)  |
|             | Thromboembolic              | 5                  | 2 (40.0)         | 3 (60.0)           | 5 (0.1)            | 2 (0.04)         | 3 (0.1)   |

AE, adverse event; SAE, Serious Adverse Event; (a) Where an event is assessed as possibly, probably or definitely related, the event is considered 'related' to the SANDWICH intervention. These events were possibly related and were expected events as listed in the study protocol; (b) the most common respiratory reason was hypoxia

**eTable 12.** Baseline ventilation parameters

| Ventilation Parameter<br>Mean (SD)          | Intervention       | Usual Care          |
|---------------------------------------------|--------------------|---------------------|
| <b>Ventilator Rate</b>                      |                    |                     |
| Prolonged IMV cohort                        | 26.5 (8.6) n=3425  | 25.5 (8.2) n=3265   |
| All Children                                | 26.0 (8.6) n=3882  | 25.1 (8.2) n=3637   |
| <b>FiO<sub>2</sub></b>                      |                    |                     |
| Prolonged IMV cohort                        | 0.37 (0.2) n=4028  | 0.4 (0.2) n=3525    |
| All Children                                | 0.36 (0.2) n=4591  | 0.4 (0.2) n=3932    |
| <b>PIP</b>                                  |                    |                     |
| Prolonged IMV cohort                        | 19.1 (4.8) n=3719  | 19.1 (4.7) n=3290   |
| All Children                                | 18.8 (4.8) n=4250  | 18.9 (4.6) n=3680   |
| <b>PEEP</b>                                 |                    |                     |
| Prolonged IMV cohort                        | 5.9 (1.4) n=3858   | 6.0 (1.5) n=3435    |
| All Patients                                | 5.8 (1.4) n=4414   | 6.0 (1.5) n=3840    |
| <b>Tidal Volume</b>                         |                    |                     |
| Prolonged IMV cohort                        | 95.0 (106.3) n=880 | 96.4 (107.7) n=1056 |
| All Children                                | 98.6 (108.1) n=984 | 99.0 (108.5) n=1160 |
| <b>Level of Pressure Support above PEEP</b> |                    |                     |
| Prolonged IMV cohort                        | 11.22 (4.1) n=3478 | 11.6 (3.4) n=2780   |
| All Children                                | 11.06 (4.1) n=3983 | 11.5 (3.3) n=3086   |

FiO<sub>2</sub>, fraction of inspired oxygen; IMV, invasive mechanical ventilation; PEEP, positive end-expiratory pressure; PIP, peak inspiratory pressure

**eTable 13.** Comparison of ventilation parameters two hours prior to extubation (control period) and prior to the start of SBT (intervention period)

| Ventilation Parameter<br>Prior to extubation<br>Mean (SD) | Intervention       | Usual Care          | Mean Difference (95% CI)     |
|-----------------------------------------------------------|--------------------|---------------------|------------------------------|
| <b>Ventilator Rate</b>                                    |                    |                     |                              |
| Prolonged IMV cohort                                      | 16.4 (7.7) n=1897  | 16.8 (7.9) n=2500   | 0.29 (-0.54, 1.11) p=0.50    |
| All Children                                              | 16.5 (7.5) n=2250  | 16.9 (7.8) n=2981   | 0.29 (-0.47, 1.04) p=0.46    |
| <b>FiO<sub>2</sub></b>                                    |                    |                     |                              |
| Prolonged IMV cohort                                      | 0.3 (0.1) n=2747   | 0.3 (0.1) n=4315    | -0.01 (-0.02, -0.003) p=0.01 |
| All Children                                              | 0.3 (0.1) n=3230   | 0.3 (0.1) n=5042    | -0.01 (-0.02, -0.01) p=0.001 |
| <b>PIP</b>                                                |                    |                     |                              |
| Prolonged IMV cohort                                      | 14.8 (3.2) n=2528  | 14.7 (3.7) n=3485   | 0.05 (-0.28, 0.38) p=0.76    |
| All Children                                              | 14.8 (3.2) n=2974  | 14.7 (3.7) n=4120   | 0.03 (-0.28, 0.33) p=0.86    |
| <b>PEEP</b>                                               |                    |                     |                              |
| Prolonged IMV cohort                                      | 5.4 (1.0) n=2715   | 5.5 (1.0) n=4256    | -0.11 (-0.20, -0.02) p=0.01  |
| All Children                                              | 5.4 (1.0) n=3184   | 5.5 (1.0) n=4975    | -0.07 (-0.15, 0.01) p=0.08   |
| <b>Tidal Volume</b>                                       |                    |                     |                              |
| Prolonged IMV cohort                                      | 87.9 (104.1) n=333 | 105.5 (113.9) n=634 | 7.71 (-21.38, 36.80) p=0.60  |
| All Children                                              | 91.1 (105.0) n=380 | 110.8 (113.9) n=767 | 2.83 (-24.61, 30.26) p=0.84  |
| <b>Pressure Support above PEEP</b>                        |                    |                     |                              |
| Prolonged IMV cohort                                      | 8.0 (2.7) n=2581   | 8.2 (2.8) n=3383    | -0.09 (-0.35, 0.18) p=0.52   |
| All Children                                              | 8.1 (2.8) n=3029   | 8.3 (2.8) n=3916    | -0.15 (-0.41, 0.10) p=0.23   |

FiO<sub>2</sub>, fraction of inspired oxygen; IMV, invasive mechanical ventilation; PEEP, positive end-expiratory pressure; PIP, peak inspiratory pressure



## eReferences

1. PICANet. Paediatric Intensive Care Audit Network (PICANet) 2019 Annual Report. <https://www.picanet.org.uk/annual-reporting-and-publications/> Published 2019. Accessed 16 July, 2020.
2. Hoffmann TC, Glasziou PP, Boutron I, et al. Better reporting of interventions: template for intervention description and replication (TIDieR) checklist and guide. *Bmj*. 2014;348:g1687.
3. Blackwood B, Tume L. The implausibility of 'usual care' in an open system: sedation and weaning practices in Paediatric Intensive Care Units (PICUs) in the United Kingdom (UK). *Trials*. 2015;16:325.
4. Ambuel B, Hamlett KW, Marx CM, Blumer JL. Assessing distress in pediatric intensive care environments: the COMFORT scale. *J Pediatr Psychol*. 1992;17(1):95-109.
5. van Dijk M, Peters JWB, van Deventer P, Tibboel D. The COMFORT Behavior Scale: A tool for assessing pain and sedation in infants. *AJN The American Journal of Nursing*. 2005;105(1):33-36.
6. Walsh TS, Kydonaki K, Antonelli J, et al. Staff education, regular sedation and analgesia quality feedback, and a sedation monitoring technology for improving sedation and analgesia quality for critically ill, mechanically ventilated patients: a cluster randomised trial. *Lancet Respir Med*. 2016;4(10):807-817.
7. Li F, Hughes JP, Hemming K, Taljaard M, Melnick ER, Heagerty PJ. Mixed-effects models for the design and analysis of stepped wedge cluster randomized trials: An overview. *Stat Methods Med Res*. 2020:962280220932962.
8. Thompson JA, Hemming K, Forbes A, Fielding K, Hayes R. Comparison of small-sample standard-error corrections for generalised estimating equations in stepped wedge cluster randomised trials with a binary outcome: A simulation study. *Stat Methods Med Res*. 2020:962280220958735.
9. Moore GF, Audrey S, Barker M, et al. Process evaluation of complex interventions: Medical Research Council guidance. *Bmj*. 2015;350:h1258.
10. Blackwood B. PRagmatic-Explanatory Continuum Indicator Summary (PRECIS-2) for the SANDWICH trial. <http://www.precis-2.org/Trials>. Published 2021. Accessed 1 February 2021.
