# Supplementary material
Source: PubMed Central journal article supplement (PMC8335576)
Supplement: jama-e2110296-s003.pdf [file jama-e2110296-s003.pdf]

## Supplemental Online Content: Nonauthor Collaborators

\*Indicates required information. Only first name, last name, and suffix will appear in PubMed.

| <b>Group Name: * SANDWICH Collaborators</b> |                |         |                  |             |                                          |                                                         |                                  |
|---------------------------------------------|----------------|---------|------------------|-------------|------------------------------------------|---------------------------------------------------------|----------------------------------|
| First Name and Middle Initial(s)*           | Last Name*     | Suffix* | Academic Degrees | Institution | Location (city, state/province, country) | Role or Contribution, eg, chair, principal investigator | Subgroup, eg, Steering Committee |
| Nazima                                      | Pathan         |         | MD               |             |                                          |                                                         |                                  |
| Deborah                                     | White          |         | RN               |             |                                          |                                                         |                                  |
| Esther                                      | Daubney        |         | RN               |             |                                          |                                                         |                                  |
| Ben                                         | Lakin          |         | MD               |             |                                          |                                                         |                                  |
| Laura                                       | Rad            |         | RN               |             |                                          |                                                         |                                  |
| Dawn                                        | Jones          |         | RN               |             |                                          |                                                         |                                  |
| Laura                                       | O'Malley       |         | RN               |             |                                          |                                                         |                                  |
| Sean                                        | Cuddihy        |         | RN               |             |                                          |                                                         |                                  |
| Alex                                        | Taylor         |         | RN               |             |                                          |                                                         |                                  |
| Jaspreet                                    | Sodhi          |         | RN               |             |                                          |                                                         |                                  |
| Katie                                       | Price          |         | RN               |             |                                          |                                                         |                                  |
| Rachel                                      | Loughead       |         | RN               |             |                                          |                                                         |                                  |
| Mireia                                      | Garcia Cusco   |         | MD               |             |                                          |                                                         |                                  |
| Sarah                                       | Mogan          |         | RN               |             |                                          |                                                         |                                  |
| Kate                                        | Baptiste       |         | RN               |             |                                          |                                                         |                                  |
| Helen                                       | Marley         |         | RN               |             |                                          |                                                         |                                  |
| Hope                                        | Lacy           |         | RN               |             |                                          |                                                         |                                  |
| Chris                                       | MacKerness     |         | RN               |             |                                          |                                                         |                                  |
| Rachel                                      | Agbecko        |         | MD               |             |                                          |                                                         |                                  |
| Angela                                      | Woodhall       |         | RN               |             |                                          |                                                         |                                  |
| Lindsay                                     | Cooper         |         | RN               |             |                                          |                                                         |                                  |
| Dawn                                        | Metcalfe       |         | Ms               |             |                                          |                                                         |                                  |
| Suzan                                       | Kakat          |         | MD               |             |                                          |                                                         |                                  |
| Lauran                                      | O'Neill        |         | RN               |             |                                          |                                                         |                                  |
| Holly                                       | Belfield       |         | RN               |             |                                          |                                                         |                                  |
| Ana Luisa                                   | Tomas          |         | RN               |             |                                          |                                                         |                                  |
| Francesca                                   | Standing       |         | RN               |             |                                          |                                                         |                                  |
| Yvonne                                      | Leonard        |         | RN               |             |                                          |                                                         |                                  |
| Helen                                       | Vander-Johnson |         | RN               |             |                                          |                                                         |                                  |

## Supplemental Online Content: Nonauthor Collaborators

\*Indicates required information. Only first name, last name, and suffix will appear in PubMed.

| First Name and Middle Initial(s)* | Last Name* | Suffix* | Academic Degrees | Institution | Location (city, state/province, country) | Role or Contribution, eg, chair, principal investigator | Subgroup, eg, Steering Committee |
|-----------------------------------|------------|---------|------------------|-------------|------------------------------------------|---------------------------------------------------------|----------------------------------|
| Deirdre                           | O'Shea     |         | MD               |             |                                          |                                                         |                                  |
| Kirsten                           | Beadon     |         | RN               |             |                                          |                                                         |                                  |
| Nicola                            | Howell     |         | RN               |             |                                          |                                                         |                                  |
| Pam                               | D'Silva    |         | MD               |             |                                          |                                                         |                                  |
| Sam                               | Archer     |         | RN               |             |                                          |                                                         |                                  |
| Stacey                            | Bedford    |         | RN               |             |                                          |                                                         |                                  |
| Jo                                | Lumsden    |         | MD               |             |                                          |                                                         |                                  |
| Louise                            | Turner     |         | RN               |             |                                          |                                                         |                                  |
| Heather                           | Rostron    |         | RN               |             |                                          |                                                         |                                  |
| Donna                             | Ellis      |         | RN               |             |                                          |                                                         |                                  |
| Sarah                             | Hanson     |         | RN               |             |                                          |                                                         |                                  |
| Emily                             | Scriven    |         | RN               |             |                                          |                                                         |                                  |
| Julie                             | Armstrong  |         | RN               |             |                                          |                                                         |                                  |
| Siva                              | Oruganti   |         | MD               |             |                                          |                                                         |                                  |
| Iona                              | Buchanan   |         | RN               |             |                                          |                                                         |                                  |
| Claire                            | Speirs     |         | RN               |             |                                          |                                                         |                                  |
| Julie                             | Richardson |         | MD               |             |                                          |                                                         |                                  |
| Caroline                          | McCluskey  |         | RN               |             |                                          |                                                         |                                  |
| Becky                             | Simpson    |         | RN               |             |                                          |                                                         |                                  |
| Carolyn                           | Green      |         | RN               |             |                                          |                                                         |                                  |
| Rachel                            | Anderson   |         | RN               |             |                                          |                                                         |                                  |
| Angela                            | Aramburo   |         | MD               |             |                                          |                                                         |                                  |
| Helena                            | Sampaio    |         | RN               |             |                                          |                                                         |                                  |
| Laura                             | Alcantara  |         | RN               |             |                                          |                                                         |                                  |
| Laura                             | Tous       |         | RN               |             |                                          |                                                         |                                  |
| John                              | Alexander  |         | MD               |             |                                          |                                                         |                                  |
| Penny                             | Percical   |         | RN               |             |                                          |                                                         |                                  |
| Claire                            | Sidley     |         | RN               |             |                                          |                                                         |                                  |
| Rum                               | Thomas     |         | MD               |             |                                          |                                                         |                                  |
| Samantha                          | Burns      |         | RN               |             |                                          |                                                         |                                  |
| Jade                              | Bryant     |         | RN               |             |                                          |                                                         |                                  |

Supplemental Online Content: Nonauthor Collaborators

\*Indicates required information. Only first name, last name, and suffix will appear in PubMed.

| First Name and Middle Initial(s)* | Last Name* | Suffix* | Academic Degrees | Institution | Location (city, state/province, country) | Role or Contribution, eg, chair, principal investigator | Subgroup, eg, Steering Committee |
|-----------------------------------|------------|---------|------------------|-------------|------------------------------------------|---------------------------------------------------------|----------------------------------|
| Amy                               | Pickard    |         | RN               |             |                                          |                                                         |                                  |
| John                              | Pappachan  |         | MD               |             |                                          |                                                         |                                  |
| Christie                          | Mellish    |         | RN               |             |                                          |                                                         |                                  |
| Soumendu                          | Manna      |         | MD               |             |                                          |                                                         |                                  |
| Elena                             | Maccacari  |         | RN               |             |                                          |                                                         |                                  |
| Joana                             | Queiroz    |         | RN               |             |                                          |                                                         |                                  |
| Sian                              | Butler     |         | RN               |             |                                          |                                                         |                                  |
| David                             | Inwald     |         | MD               |             |                                          |                                                         |                                  |
| Thomas                            | Bycroft    |         | MD               |             |                                          |                                                         |                                  |
| Sarah                             | Darnell    |         | RN               |             |                                          |                                                         |                                  |
