# Supplementary material
Source: PubMed Central journal article supplement (PMC8335576)
Supplement: jama-e2110296-s004.pdf [file jama-e2110296-s004.pdf]

# Data Sharing Statement

Blackwood. Effect of a Sedation and Ventilator Liberation Protocol vs Usual Care on Duration of Invasive Mechanical Ventilation in Pediatric Intensive Care Units. *JAMA*. Published August 03, 2021.  
doi:10.1001/jama.2021.10296

## Data

**Data available:** Yes

**Data types:** Deidentified participant data

**How to access data:** Requests for data sharing will be reviewed on an individual basis by contacting the Chief Investigator, Bronagh Blackwood at [b.blackwood@qub.ac.uk](mailto:b.blackwood@qub.ac.uk)

**When available:** beginning date: 01-31-2023

## Supporting Documents

**Document types:** None

## Additional Information

**Who can access the data:** We shall make data available to the scientific community with as few restrictions as feasible, while retaining exclusive use until the publication of major outputs.

**Types of analyses:** For any purpose

**Mechanisms of data availability:** Requests should be directed to [b.blackwood@qub.ac.uk](mailto:b.blackwood@qub.ac.uk). To gain access, data requesters will need to sign a data access agreement.
